# Supplementary material for: Melamine-derived N-rich C-entrapped Au nanoparticles for sensitive and selective monitoring of dopamine in blood samples
Source: Royal Society of Chemistry journal article supplement (doi:10.1039/d2ra02754b), 2022-01-01
Supplement: d2ra02754b1.pdf [file d2ra02754b1.pdf]

## Supporting Information

### Melamine derived N rich C entrapped Au nanoparticles for sensitive and selective monitoring of dopamine from blood samples

Faria Shakeel<sup>a</sup>, Muhammad Waseem Fazal<sup>b</sup>, Anam Zulfiqar<sup>c</sup>, Farhan Zafar<sup>b</sup>, Naeem Akhtar<sup>b\*</sup>, Arsalan Ahmed<sup>b</sup>, Hafiz Badaruddin Ahmad<sup>a\*</sup>, Safeer Ahmed<sup>d</sup>, Asad Syed<sup>e</sup>, Ali H. Bahkali<sup>e</sup>, Muhammad Abdullah<sup>f</sup> and Zahid Shafiq<sup>a,g\*</sup>

<sup>a</sup>*Institute of Chemical Sciences, Bahauddin Zakariya University, Multan 60800, Pakistan*

<sup>b</sup>*Interdisciplinary Research Centre in Biomedical Materials (IRCBM), COMSATS University Islamabad, Lahore Campus, Lahore 54000, Pakistan*

<sup>c</sup>*Department of Biochemistry, Bahauddin Zakariya University, 60800, Multan, Pakistan*

<sup>d</sup>*Department of Chemistry, Quaid-i-Azam University, 45320, Islamabad, Pakistan*

<sup>e</sup>*Department of Botany and Microbiology, College of Science, King Saud University, P.O. 2455, Riyadh, 11451, Saudi Arabia*

<sup>f</sup>*Department of Chemistry, University of Massachusetts Amherst, 710 North Pleasant Street, Amherst, Massachusetts 01003, United States*

<sup>g</sup>*Department of Pharmaceutical & Medicinal Chemistry, An der Immenburg 4, D-53121 Bonn, Germany*

Dr. Naeem Akhtar: [naeemkhan@cuilahore.edu.pk](mailto:naeemkhan@cuilahore.edu.pk)

Prof. Dr. Zahid Shafiq: [zahidshafiq@bzu.edu.pk](mailto:zahidshafiq@bzu.edu.pk)

Dr. Badaruddin Ahmad: [hafizbadar@googlemail.com](mailto:hafizbadar@googlemail.com)

## **S-1 Instruments**

The electrochemical measurements were performed with a Gamry electrochemical workstation (Inreface-1010). A conventional three-electrode cell was used at room temperature (24°C), graphitic lead pencil electrode (GPE) as a working electrode, platinum wire as a counter electrode, and Ag/AgCl electrode as reference electrode, respectively. Electrochemical impedance spectroscopy (EIS) was performed in 5mM  $[\text{Fe}(\text{CN})_6]^{4-/3-}$  as a redox probe. The morphology of the modified electrode was examined using a transmission electron microscopy (TEM) system (F200×, The Thermo Scientific, Waltham, MA USA). Raman spectroscopy was performed using a EnSpectr R532 Raman spectrometer (Enhanced Spectrometry, Inc., Torrance, CA, USA).

## **S-2 Synthesis of benzimidazolium-1-acetate ionic liquid (IL)**

Benzimidazolium-1-acetate ionic liquid (IL) was synthesized by conventional neutralization of benzimidazole with acetic acid as reported in literature <sup>1</sup>. Briefly, 15 mM of benzimidazole was dissolved into 10 mL of methanol in a round bottom flask under classical conditions and the solution was continuously stirred for 2h at 65°C. Next, 0.95 mL of acetic acid solution was added dropwise into the above prepared solution and kept under reflux overnight. Finally, the resulting light-yellow mixture was heated at 100°C in a rotary evaporator for 3h and upon cooling at room temperature, the IL product was made and used for analytical purposes.

### S-3 NMR analyses of benzimidazolium-1-acetate ionic liquid (IL)

The purities of BAIL were verified by NMR.

$^1\text{H}$  NMR:  $\delta = 1.97$  (s, 3H), 5.11 (s, 1H), 7.23 –7.25 (m, 2H), 7.58 –7.6 (m, 2H), 8.23 (s, 1H)

<sup>2</sup>(Figure S1).

$^{13}\text{C}$  NMR: 21.5 (methyl peak), 115.7, 122.1, 138.4, 142.3, 172.5 (carbonyl carbon of acetate ion)<sup>3</sup> (Figure S2).

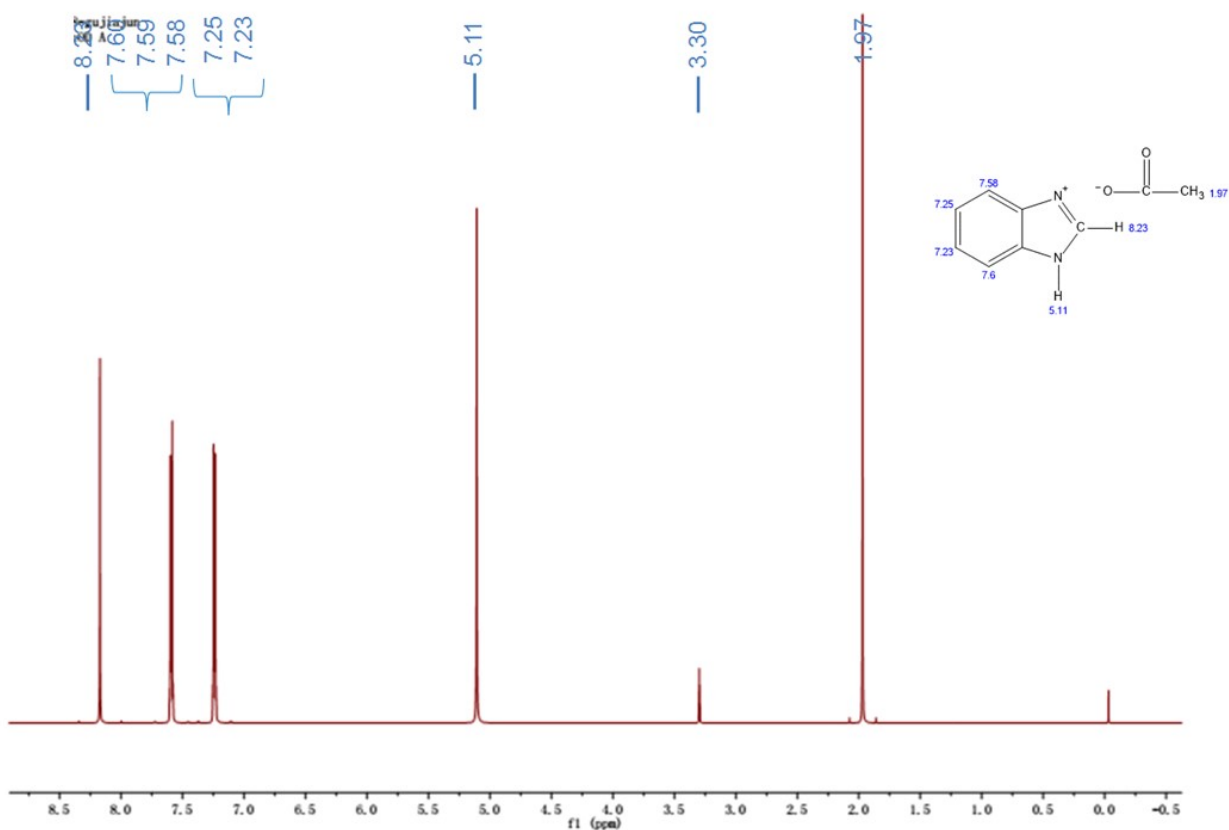

**Figure S1.**  $^1\text{H}$  NMR of IL

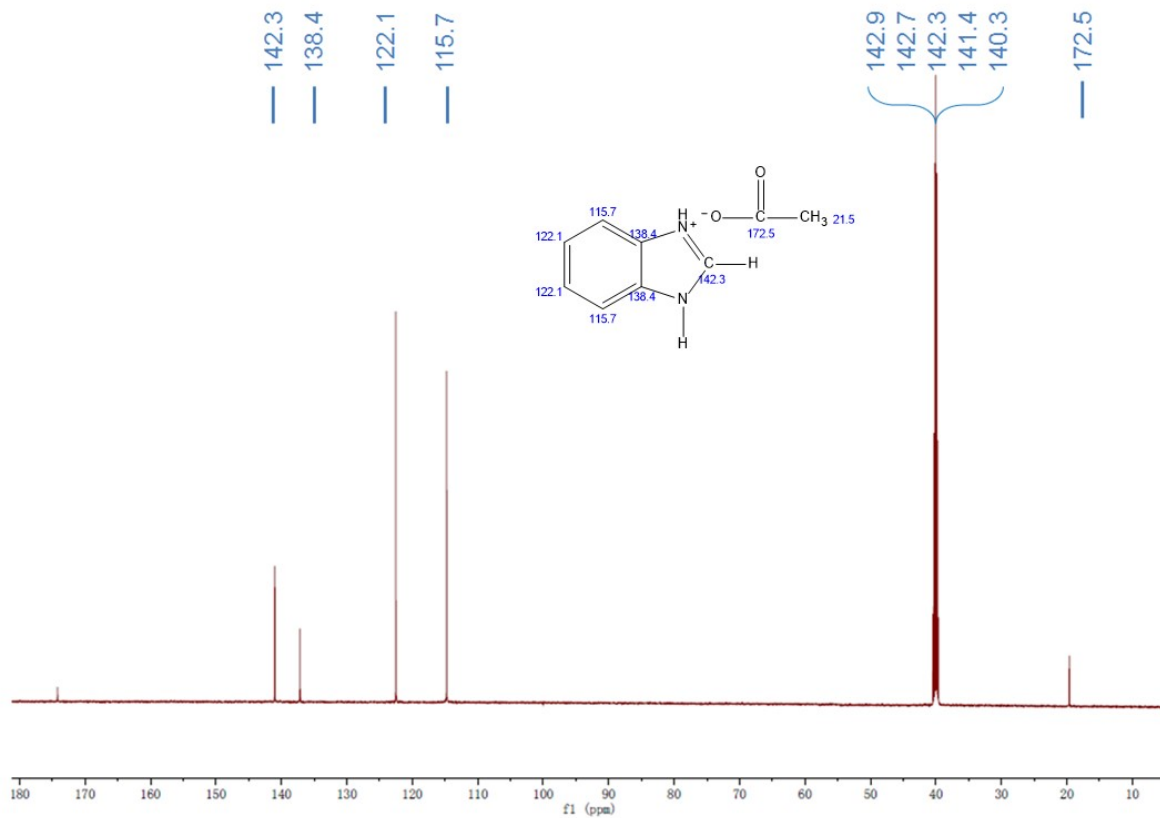

**Figure S2.** <sup>13</sup>C NMR of IL

**S-4 Fourier transforms infrared (FTIR) spectroscopy analyses of IL**

FTIR spectroscopy has been employed to analyze the chemical structure of as-synthesized IL. The band at  $2981\text{ cm}^{-1}$  is assigned to the alkyl group. The peak around  $3112\text{ cm}^{-1}$  corresponds to alkenyl C—H stretching. The band at  $1701$  and  $1619\text{ cm}^{-1}$  are due to the occurrence of C=O bonds and C=N, respectively. Also, the absence of stretching vibrations around  $3000\text{ cm}^{-1}$  (O—H) verifies the presence of acetate ion.

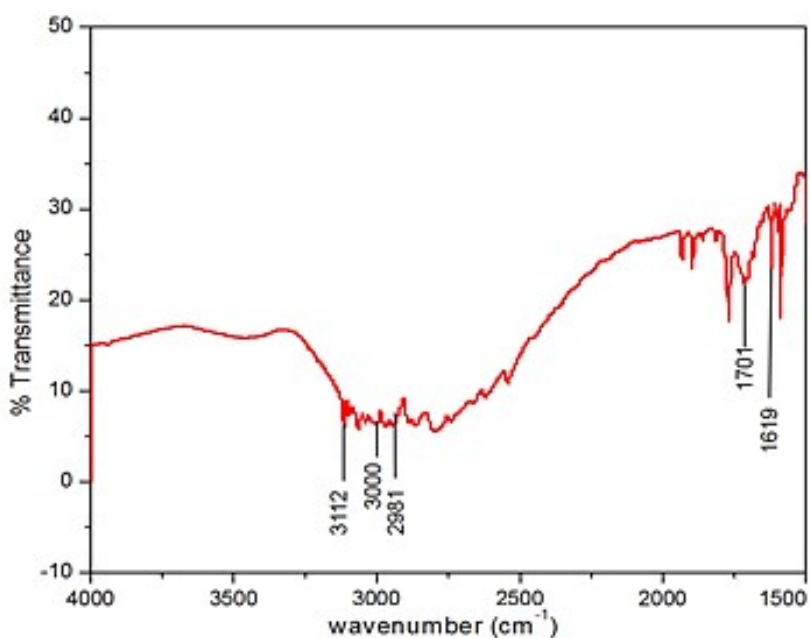

**Figure S3** FTIR analysis of benzimidazolium-1-acetate ionic liquid (IL)

**Scherer equation used to calculate the crystalline size**

$$d = k \cdot \lambda / \beta \cdot \cos\theta$$

Where,

d = Crystallite size (nm)

$\beta$  (the peak width of the diffraction peak or full width at the half maximum: FWHM)

$\cos\theta$  = ( $\theta$  is the half of diffraction angle).

Scherer constant k = 0.9

$\lambda$  = 0.15406 nm X-ray wavelength

**Williamson-Hull equation to calculate the strain**

$$\beta \cos(\theta) = (k\lambda/d) + (\eta \sin(\theta))$$

$\eta$  = Strain factor

**Table S1** Table showing the calculation for average crystalline size and strain.

| Parameter     |            | Peak position | FWHM    |                       | Sherer            | X-axis         | Y-axis             | Intercepts | Slope | Micro-strain     |
|---------------|------------|---------------|---------|-----------------------|-------------------|----------------|--------------------|------------|-------|------------------|
| K             | Lambda (A) | 2 $\theta$    | $\beta$ | Crystalline size (nm) | Average size (nm) | 4 Sin $\theta$ | $\beta \cos\theta$ | C=K A/D    | m     | *10 <sup>3</sup> |
| <b>Au-NPs</b> |            |               |         |                       |                   |                |                    |            |       |                  |
| 0.9           | 0.154      | 38.1167       | 0.3945  | 21.29714              | 17.19782          | 1.306124       | 0.006508           | 0.0053     | 0.002 | 1.6              |
|               |            | 44.3051       | 0.55006 | 15.58759              |                   | 1.508296       | 0.008892           |            |       |                  |
|               |            | 64.5425       | 0.54746 | 17.15554              |                   | 2.135712       | 0.008079           |            |       |                  |
|               |            | 77.5342       | 0.69046 | 14.75099              |                   | 2.504625       | 0.009396           |            |       |                  |
|               |            |               |         |                       |                   |                |                    |            |       |                  |
|               |            |               |         |                       |                   |                |                    |            |       |                  |
|               |            |               |         |                       |                   |                |                    |            |       |                  |
|               |            |               |         |                       |                   |                |                    |            |       |                  |

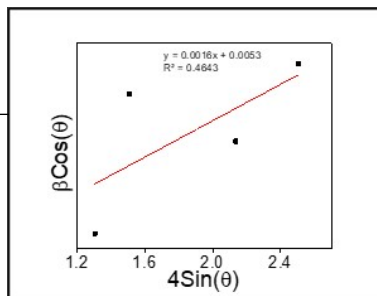



A = constant

Absorption edge was observed for the transitions for  $n = 2$

**Table S2** Table showing the calculation for band gap.

| Wavelength (nm) | Absorbance (a.u.) | Absorbance (a.u.) | Absorption coefficient ( $\alpha$ ) $\text{cm}^{-1}$ | Absorption coefficient ( $\alpha$ ) $\text{cm}^{-1}$ | Energy (eV) | $(\alpha h\nu)^2$ | $(\alpha h\nu)^2$ |
|-----------------|-------------------|-------------------|------------------------------------------------------|------------------------------------------------------|-------------|-------------------|-------------------|
| 698             | 0.029             | 0.025             | 0.066787                                             | 0.057575                                             | 1.776504    | 0.118647          | 0.102282          |
| 696             | 0.029             | 0.026             | 0.066787                                             | 0.059878                                             | 1.781609    | 0.118988          | 0.106679          |
| 694             | 0.029             | 0.026             | 0.066787                                             | 0.059878                                             | 1.786744    | 0.119331          | 0.106987          |
| 692             | 0.029             | 0.027             | 0.066787                                             | 0.062181                                             | 1.791908    | 0.119676          | 0.111423          |
| 690             | 0.029             | 0.028             | 0.066787                                             | 0.064484                                             | 1.797101    | 0.120023          | 0.115884          |
| 688             | 0.03              | 0.028             | 0.06909                                              | 0.064484                                             | 1.802326    | 0.124523          | 0.116221          |
| 686             | 0.03              | 0.029             | 0.06909                                              | 0.066787                                             | 1.80758     | 0.124886          | 0.120723          |
| 684             | 0.03              | 0.029             | 0.06909                                              | 0.066787                                             | 1.812865    | 0.125251          | 0.121076          |
| 682             | 0.03              | 0.03              | 0.06909                                              | 0.06909                                              | 1.818182    | 0.125618          | 0.125618          |
| 680             | 0.03              | 0.03              | 0.06909                                              | 0.06909                                              | 1.823529    | 0.125988          | 0.125988          |
| 678             | 0.031             | 0.031             | 0.071393                                             | 0.071393                                             | 1.828909    | 0.130571          | 0.130571          |
| 676             | 0.031             | 0.031             | 0.071393                                             | 0.071393                                             | 1.83432     | 0.130958          | 0.130958          |
| 674             | 0.031             | 0.032             | 0.071393                                             | 0.073696                                             | 1.839763    | 0.131346          | 0.135583          |
| 672             | 0.031             | 0.033             | 0.071393                                             | 0.075999                                             | 1.845238    | 0.131737          | 0.140236          |
| 670             | 0.032             | 0.034             | 0.073696                                             | 0.078302                                             | 1.850746    | 0.136393          | 0.144917          |
| 668             | 0.032             | 0.034             | 0.073696                                             | 0.078302                                             | 1.856287    | 0.136801          | 0.145351          |
| 666             | 0.032             | 0.035             | 0.073696                                             | 0.080605                                             | 1.861862    | 0.137212          | 0.150075          |



|     |       |       |          |          |              |              |              |
|-----|-------|-------|----------|----------|--------------|--------------|--------------|
| 664 | 0.033 | 0.036 | 0.075999 | 0.082908 | 1.8674<br>7  | 0.1419<br>26 | 0.1548<br>28 |
| 662 | 0.033 | 0.037 | 0.075999 | 0.085211 | 1.8731<br>12 | 0.1423<br>55 | 0.1596<br>1  |
| 660 | 0.033 | 0.038 | 0.075999 | 0.087514 | 1.8787<br>88 | 0.1427<br>86 | 0.1644<br>2  |
| 658 | 0.034 | 0.039 | 0.078302 | 0.089817 | 1.8844<br>98 | 0.1475<br>6  | 0.1692<br>6  |
| 656 | 0.034 | 0.041 | 0.078302 | 0.094423 | 1.8902<br>44 | 0.1480<br>1  | 0.1784<br>83 |
| 654 | 0.035 | 0.042 | 0.080605 | 0.096726 | 1.8960<br>24 | 0.1528<br>29 | 0.1833<br>95 |
| 652 | 0.035 | 0.043 | 0.080605 | 0.099029 | 1.9018<br>4  | 0.1532<br>98 | 0.1883<br>37 |
| 650 | 0.036 | 0.045 | 0.082908 | 0.103635 | 1.9076<br>92 | 0.1581<br>63 | 0.1977<br>04 |
| 648 | 0.037 | 0.046 | 0.085211 | 0.105938 | 1.9135<br>8  | 0.1630<br>58 | 0.2027<br>21 |
| 646 | 0.037 | 0.048 | 0.085211 | 0.110544 | 1.9195<br>05 | 0.1635<br>63 | 0.2121<br>9  |
| 644 | 0.038 | 0.05  | 0.087514 | 0.11515  | 1.9254<br>66 | 0.1685<br>05 | 0.2217<br>17 |
| 642 | 0.038 | 0.051 | 0.087514 | 0.117453 | 1.9314<br>64 | 0.1690<br>3  | 0.2268<br>56 |
| 640 | 0.039 | 0.053 | 0.089817 | 0.122059 | 1.9375       | 0.1740<br>2  | 0.2364<br>89 |
| 638 | 0.04  | 0.055 | 0.09212  | 0.126665 | 1.9435<br>74 | 0.1790<br>42 | 0.2461<br>83 |
| 636 | 0.041 | 0.058 | 0.094423 | 0.133574 | 1.9496<br>86 | 0.1840<br>95 | 0.2604<br>27 |
| 634 | 0.042 | 0.06  | 0.096726 | 0.13818  | 1.9558<br>36 | 0.1891<br>8  | 0.2702<br>57 |
| 632 | 0.043 | 0.063 | 0.099029 | 0.145089 | 1.9620<br>25 | 0.1942<br>97 | 0.2846<br>68 |
| 630 | 0.044 | 0.066 | 0.101332 | 0.151998 | 1.9682<br>54 | 0.1994<br>47 | 0.2991<br>71 |
| 628 | 0.045 | 0.069 | 0.103635 | 0.158907 | 1.9745<br>22 | 0.2046<br>3  | 0.3137<br>65 |
| 626 | 0.046 | 0.072 | 0.105938 | 0.165816 | 1.9808<br>31 | 0.2098<br>45 | 0.3284<br>53 |
| 624 | 0.047 | 0.075 | 0.108241 | 0.172725 | 1.9871<br>79 | 0.2150<br>94 | 0.3432<br>36 |
| 622 | 0.048 | 0.078 | 0.110544 | 0.179634 | 1.9935<br>69 | 0.2203<br>77 | 0.3581<br>13 |
| 620 | 0.049 | 0.081 | 0.112847 | 0.186543 | 2            | 0.2256<br>94 | 0.3730<br>86 |
| 618 | 0.05  | 0.085 | 0.11515  | 0.195755 | 2.0064       | 0.2310       | 0.3927       |

|     |       |       |          |          |              |              |              |
|-----|-------|-------|----------|----------|--------------|--------------|--------------|
|     |       |       |          |          | 72           | 45           | 77           |
| 616 | 0.051 | 0.088 | 0.117453 | 0.202664 | 2.0129<br>87 | 0.2364<br>31 | 0.4079<br>6  |
| 614 | 0.052 | 0.092 | 0.119756 | 0.211876 | 2.0195<br>44 | 0.2418<br>53 | 0.4278<br>93 |
| 612 | 0.054 | 0.096 | 0.124362 | 0.221088 | 2.0261<br>44 | 0.2519<br>75 | 0.4479<br>56 |
| 610 | 0.055 | 0.1   | 0.126665 | 0.2303   | 2.0327<br>87 | 0.2574<br>83 | 0.4681<br>51 |
| 608 | 0.057 | 0.104 | 0.131271 | 0.239512 | 2.0394<br>74 | 0.2677<br>24 | 0.4884<br>78 |
| 606 | 0.058 | 0.109 | 0.133574 | 0.251027 | 2.0462<br>05 | 0.2733<br>2  | 0.5136<br>53 |
| 604 | 0.06  | 0.113 | 0.13818  | 0.260239 | 2.0529<br>8  | 0.2836<br>81 | 0.5342<br>65 |
| 602 | 0.061 | 0.118 | 0.140483 | 0.271754 | 2.0598<br>01 | 0.2893<br>67 | 0.5597<br>59 |
| 600 | 0.063 | 0.123 | 0.145089 | 0.283269 | 2.0666<br>67 | 0.2998<br>51 | 0.5854<br>23 |
| 598 | 0.065 | 0.129 | 0.149695 | 0.297087 | 2.0735<br>79 | 0.3104<br>04 | 0.6160<br>33 |
| 596 | 0.067 | 0.134 | 0.154301 | 0.308602 | 2.0805<br>37 | 0.3210<br>29 | 0.6420<br>58 |
| 594 | 0.069 | 0.14  | 0.158907 | 0.32242  | 2.0875<br>42 | 0.3317<br>25 | 0.6730<br>65 |
| 592 | 0.072 | 0.145 | 0.165816 | 0.333935 | 2.0945<br>95 | 0.3473<br>17 | 0.6994<br>58 |
| 590 | 0.074 | 0.151 | 0.170422 | 0.347753 | 2.1016<br>95 | 0.3581<br>75 | 0.7308<br>71 |
| 588 | 0.077 | 0.157 | 0.177331 | 0.361571 | 2.1088<br>44 | 0.3739<br>63 | 0.7624<br>97 |
| 586 | 0.08  | 0.163 | 0.18424  | 0.375389 | 2.1160<br>41 | 0.3898<br>59 | 0.7943<br>38 |
| 584 | 0.082 | 0.17  | 0.188846 | 0.39151  | 2.1232<br>88 | 0.4009<br>74 | 0.8312<br>88 |
| 582 | 0.085 | 0.176 | 0.195755 | 0.405328 | 2.1305<br>84 | 0.4170<br>73 | 0.8635<br>85 |
| 580 | 0.089 | 0.183 | 0.204967 | 0.421449 | 2.1379<br>31 | 0.4382<br>05 | 0.9010<br>29 |
| 578 | 0.092 | 0.189 | 0.211876 | 0.435267 | 2.1453<br>29 | 0.4545<br>44 | 0.9337<br>91 |
| 576 | 0.095 | 0.197 | 0.218785 | 0.453691 | 2.1527<br>78 | 0.4709<br>95 | 0.9766<br>96 |
| 574 | 0.099 | 0.204 | 0.227997 | 0.469812 | 2.1602<br>79 | 0.4925<br>37 | 1.0149<br>25 |
| 572 | 0.103 | 0.211 | 0.237209 | 0.485933 | 2.1678<br>32 | 0.5142<br>29 | 1.0534<br>21 |

|     |       |       |          |          |              |              |              |
|-----|-------|-------|----------|----------|--------------|--------------|--------------|
| 570 | 0.107 | 0.219 | 0.246421 | 0.504357 | 2.1754<br>39 | 0.5360<br>74 | 1.0971<br>98 |
| 568 | 0.111 | 0.227 | 0.255633 | 0.522781 | 2.1830<br>99 | 0.5580<br>72 | 1.1412<br>82 |
| 566 | 0.116 | 0.234 | 0.267148 | 0.538902 | 2.1908<br>13 | 0.5852<br>71 | 1.1806<br>33 |
| 564 | 0.12  | 0.242 | 0.27636  | 0.557326 | 2.1985<br>82 | 0.6076       | 1.2253<br>27 |
| 562 | 0.125 | 0.25  | 0.287875 | 0.57575  | 2.2064<br>06 | 0.6351<br>69 | 1.2703<br>38 |
| 560 | 0.13  | 0.257 | 0.29939  | 0.591871 | 2.2142<br>86 | 0.6629<br>35 | 1.3105<br>72 |
| 558 | 0.135 | 0.265 | 0.310905 | 0.610295 | 2.2222<br>22 | 0.6909       | 1.3562<br>11 |
| 556 | 0.14  | 0.272 | 0.32242  | 0.626416 | 2.2302<br>16 | 0.7190<br>66 | 1.3970<br>43 |
| 554 | 0.146 | 0.28  | 0.336238 | 0.64484  | 2.2382<br>67 | 0.7525<br>9  | 1.4433<br>24 |
| 552 | 0.152 | 0.287 | 0.350056 | 0.660961 | 2.2463<br>77 | 0.7863<br>58 | 1.4847<br>67 |
| 550 | 0.158 | 0.294 | 0.363874 | 0.677082 | 2.2545<br>45 | 0.8203<br>7  | 1.5265<br>12 |
| 548 | 0.164 | 0.301 | 0.377692 | 0.693203 | 2.2627<br>74 | 0.8546<br>32 | 1.5685<br>62 |
| 546 | 0.17  | 0.307 | 0.39151  | 0.707021 | 2.2710<br>62 | 0.8891<br>44 | 1.6056<br>89 |
| 544 | 0.176 | 0.313 | 0.405328 | 0.720839 | 2.2794<br>12 | 0.9239<br>09 | 1.6430<br>89 |
| 542 | 0.182 | 0.318 | 0.419146 | 0.732354 | 2.2878<br>23 | 0.9589<br>32 | 1.6754<br>96 |
| 540 | 0.187 | 0.322 | 0.430661 | 0.741566 | 2.2962<br>96 | 0.9889<br>25 | 1.7028<br>55 |
| 538 | 0.192 | 0.326 | 0.442176 | 0.750778 | 2.3048<br>33 | 1.0191<br>42 | 1.7304<br>18 |
| 536 | 0.197 | 0.33  | 0.453691 | 0.75999  | 2.3134<br>33 | 1.0495<br>84 | 1.7581<br>86 |
| 534 | 0.201 | 0.332 | 0.462903 | 0.764596 | 2.3220<br>97 | 1.0749<br>06 | 1.7754<br>66 |
| 532 | 0.205 | 0.334 | 0.472115 | 0.769202 | 2.3308<br>27 | 1.1004<br>18 | 1.7928<br>77 |
| 530 | 0.208 | 0.334 | 0.479024 | 0.769202 | 2.3396<br>23 | 1.1207<br>35 | 1.7996<br>42 |
| 528 | 0.209 | 0.334 | 0.481327 | 0.769202 | 2.3484<br>85 | 1.1303<br>89 | 1.8064<br>59 |
| 526 | 0.211 | 0.333 | 0.485933 | 0.766899 | 2.3574<br>14 | 1.1455<br>45 | 1.8078<br>99 |
| 524 | 0.211 | 0.33  | 0.485933 | 0.75999  | 2.3664       | 1.1499       | 1.7984       |

|     |       |       |          |          |              |              |              |
|-----|-------|-------|----------|----------|--------------|--------------|--------------|
|     |       |       |          |          | 12           | 18           | 5            |
| 522 | 0.211 | 0.327 | 0.485933 | 0.753081 | 2.3754<br>79 | 1.1543<br>24 | 1.7889<br>28 |
| 520 | 0.209 | 0.323 | 0.481327 | 0.743869 | 2.3846<br>15 | 1.1477<br>8  | 1.7738<br>41 |
| 518 | 0.208 | 0.318 | 0.479024 | 0.732354 | 2.3938<br>22 | 1.1466<br>98 | 1.7531<br>25 |
| 516 | 0.205 | 0.313 | 0.472115 | 0.720839 | 2.4031<br>01 | 1.1345<br>4  | 1.7322<br>49 |
| 514 | 0.202 | 0.307 | 0.465206 | 0.707021 | 2.4124<br>51 | 1.1222<br>87 | 1.7056<br>54 |
| 512 | 0.199 | 0.3   | 0.458297 | 0.6909   | 2.4218<br>75 | 1.1099<br>38 | 1.6732<br>73 |
| 510 | 0.195 | 0.293 | 0.449085 | 0.674779 | 2.4313<br>73 | 1.0918<br>93 | 1.6406<br>39 |
| 508 | 0.191 | 0.286 | 0.439873 | 0.658658 | 2.4409<br>45 | 1.0737<br>06 | 1.6077<br>48 |
| 506 | 0.187 | 0.278 | 0.430661 | 0.640234 | 2.4505<br>93 | 1.0553<br>75 | 1.5689<br>53 |
| 504 | 0.182 | 0.27  | 0.419146 | 0.62181  | 2.4603<br>17 | 1.0312<br>32 | 1.5298<br>5  |
| 502 | 0.178 | 0.262 | 0.409934 | 0.603386 | 2.4701<br>2  | 1.0125<br>86 | 1.4904<br>36 |
| 500 | 0.173 | 0.255 | 0.398419 | 0.587265 | 2.48         | 0.9880<br>79 | 1.4564<br>17 |
| 498 | 0.169 | 0.247 | 0.389207 | 0.568841 | 2.4899<br>6  | 0.9691<br>1  | 1.4163<br>91 |
| 496 | 0.165 | 0.24  | 0.379995 | 0.55272  | 2.5          | 0.9499<br>88 | 1.3818       |
| 494 | 0.161 | 0.234 | 0.370783 | 0.538902 | 2.5101<br>21 | 0.9307<br>1  | 1.3527<br>09 |
| 492 | 0.158 | 0.228 | 0.363874 | 0.525084 | 2.5203<br>25 | 0.9170<br>81 | 1.3233<br>82 |
| 490 | 0.154 | 0.222 | 0.354662 | 0.511266 | 2.5306<br>12 | 0.8975<br>12 | 1.2938<br>16 |
| 488 | 0.151 | 0.217 | 0.347753 | 0.499751 | 2.5409<br>84 | 0.8836<br>35 | 1.2698<br>59 |
| 486 | 0.148 | 0.213 | 0.340844 | 0.490539 | 2.5514<br>4  | 0.8696<br>43 | 1.2515<br>81 |
| 484 | 0.146 | 0.209 | 0.336238 | 0.481327 | 2.5619<br>83 | 0.8614<br>36 | 1.2331<br>52 |
| 482 | 0.144 | 0.205 | 0.331632 | 0.472115 | 2.5726<br>14 | 0.8531<br>61 | 1.2145<br>7  |
| 480 | 0.142 | 0.202 | 0.327026 | 0.465206 | 2.5833<br>33 | 0.8448<br>17 | 1.2017<br>82 |
| 478 | 0.14  | 0.199 | 0.32242  | 0.458297 | 2.5941<br>42 | 0.8364<br>03 | 1.1888<br>88 |

|     |       |       |          |          |              |              |              |
|-----|-------|-------|----------|----------|--------------|--------------|--------------|
| 476 | 0.139 | 0.197 | 0.320117 | 0.453691 | 2.6050<br>42 | 0.8339<br>18 | 1.1818<br>84 |
| 474 | 0.137 | 0.195 | 0.315511 | 0.449085 | 2.6160<br>34 | 0.8253<br>87 | 1.1748<br>22 |
| 472 | 0.136 | 0.193 | 0.313208 | 0.444479 | 2.6271<br>19 | 0.8228<br>35 | 1.1676<br>99 |
| 470 | 0.135 | 0.191 | 0.310905 | 0.439873 | 2.6382<br>98 | 0.8202<br>6  | 1.1605<br>16 |
| 468 | 0.134 | 0.19  | 0.308602 | 0.43757  | 2.6495<br>73 | 0.8176<br>63 | 1.1593<br>74 |
| 466 | 0.133 | 0.189 | 0.306299 | 0.435267 | 2.6609<br>44 | 0.8150<br>45 | 1.1582<br>21 |
| 464 | 0.133 | 0.188 | 0.306299 | 0.432964 | 2.6724<br>14 | 0.8185<br>58 | 1.1570<br>59 |
| 462 | 0.132 | 0.187 | 0.303996 | 0.430661 | 2.6839<br>83 | 0.8159<br>2  | 1.1558<br>87 |
| 460 | 0.132 | 0.186 | 0.303996 | 0.428358 | 2.6956<br>52 | 0.8194<br>67 | 1.1547<br>04 |
| 458 | 0.131 | 0.185 | 0.301693 | 0.426055 | 2.7074<br>24 | 0.8168<br>11 | 1.1535<br>11 |
| 456 | 0.131 | 0.185 | 0.301693 | 0.426055 | 2.7192<br>98 | 0.8203<br>93 | 1.1585<br>71 |
| 454 | 0.13  | 0.185 | 0.29939  | 0.426055 | 2.7312<br>78 | 0.8177<br>17 | 1.1636<br>74 |
| 452 | 0.13  | 0.184 | 0.29939  | 0.423752 | 2.7433<br>63 | 0.8213<br>35 | 1.1625<br>05 |
| 450 | 0.13  | 0.184 | 0.29939  | 0.423752 | 2.7555<br>56 | 0.8249<br>86 | 1.1676<br>72 |
| 448 | 0.13  | 0.184 | 0.29939  | 0.423752 | 2.7678<br>57 | 0.8286<br>69 | 1.1728<br>85 |
| 446 | 0.129 | 0.184 | 0.297087 | 0.423752 | 2.7802<br>69 | 0.8259<br>82 | 1.1781<br>45 |
| 444 | 0.129 | 0.184 | 0.297087 | 0.423752 | 2.7927<br>93 | 0.8297<br>02 | 1.1834<br>52 |
| 442 | 0.129 | 0.184 | 0.297087 | 0.423752 | 2.8054<br>3  | 0.8334<br>57 | 1.1888<br>07 |
| 440 | 0.129 | 0.184 | 0.297087 | 0.423752 | 2.8181<br>82 | 0.8372<br>45 | 1.1942<br>1  |
| 438 | 0.13  | 0.185 | 0.29939  | 0.426055 | 2.8310<br>5  | 0.8475<br>88 | 1.2061<br>83 |
| 436 | 0.13  | 0.185 | 0.29939  | 0.426055 | 2.8440<br>37 | 0.8514<br>76 | 1.2117<br>16 |
| 434 | 0.13  | 0.185 | 0.29939  | 0.426055 | 2.8571<br>43 | 0.8554       | 1.2173       |
| 432 | 0.13  | 0.185 | 0.29939  | 0.426055 | 2.8703<br>7  | 0.8593<br>6  | 1.2229<br>36 |
| 430 | 0.13  | 0.186 | 0.29939  | 0.428358 | 2.8837       | 0.8633       | 1.2352       |

|     |       |       |          |          |              |              |              |
|-----|-------|-------|----------|----------|--------------|--------------|--------------|
|     |       |       |          |          | 21           | 57           | 65           |
| 428 | 0.131 | 0.186 | 0.301693 | 0.428358 | 2.8971<br>96 | 0.8740<br>64 | 1.2410<br>37 |
| 426 | 0.131 | 0.187 | 0.301693 | 0.430661 | 2.9107<br>98 | 0.8781<br>67 | 1.2535<br>67 |
| 424 | 0.131 | 0.187 | 0.301693 | 0.430661 | 2.9245<br>28 | 0.8823<br>1  | 1.2594<br>8  |
| 422 | 0.132 | 0.188 | 0.303996 | 0.432964 | 2.9383<br>89 | 0.8932<br>58 | 1.2722<br>16 |
| 420 | 0.132 | 0.188 | 0.303996 | 0.432964 | 2.9523<br>81 | 0.8975<br>12 | 1.2782<br>75 |
| 418 | 0.132 | 0.189 | 0.303996 | 0.435267 | 2.9665<br>07 | 0.9018<br>06 | 1.2912<br>23 |
| 416 | 0.133 | 0.19  | 0.306299 | 0.43757  | 2.9807<br>69 | 0.9130<br>07 | 1.3042<br>95 |
| 414 | 0.133 | 0.19  | 0.306299 | 0.43757  | 2.9951<br>69 | 0.9174<br>17 | 1.3105<br>96 |
| 412 | 0.134 | 0.191 | 0.308602 | 0.439873 | 3.0097<br>09 | 0.9288<br>02 | 1.3238<br>9  |
| 410 | 0.134 | 0.192 | 0.308602 | 0.442176 | 3.0243<br>9  | 0.9333<br>33 | 1.3373<br>13 |
| 408 | 0.135 | 0.193 | 0.310905 | 0.444479 | 3.0392<br>16 | 0.9449<br>07 | 1.3508<br>68 |
| 406 | 0.135 | 0.193 | 0.310905 | 0.444479 | 3.0541<br>87 | 0.9495<br>62 | 1.3575<br>22 |
| 404 | 0.136 | 0.194 | 0.313208 | 0.446782 | 3.0693<br>07 | 0.9613<br>31 | 1.3713<br>11 |
| 402 | 0.137 | 0.195 | 0.315511 | 0.449085 | 3.0845<br>77 | 0.9732<br>18 | 1.3852<br>37 |
| 400 | 0.137 | 0.196 | 0.315511 | 0.451388 | 3.1          | 0.9780<br>84 | 1.3993<br>03 |

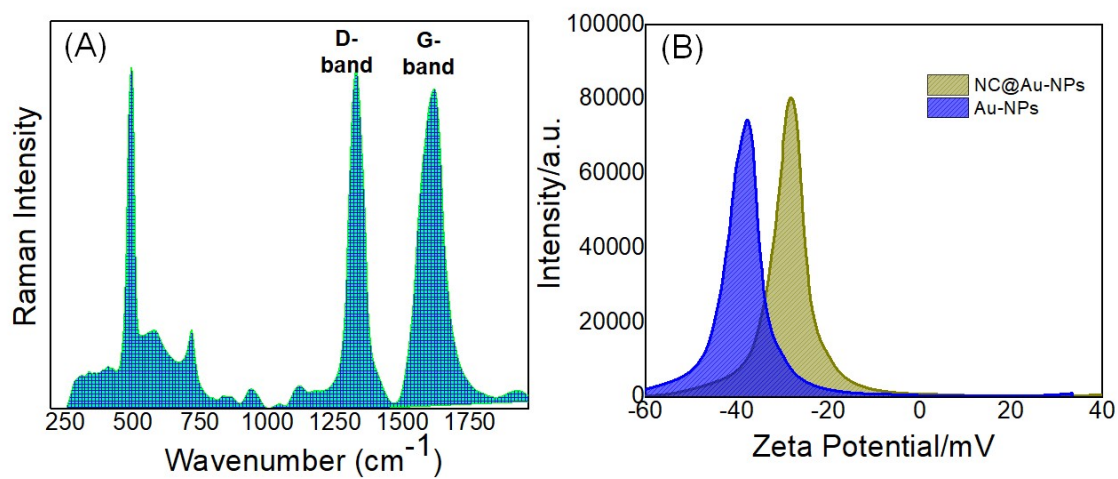

**Figure S4** (A) Raman spectra of NC@Au-NPs. (B) Zeta potential of NC@Au-NPs and Au-NPs.

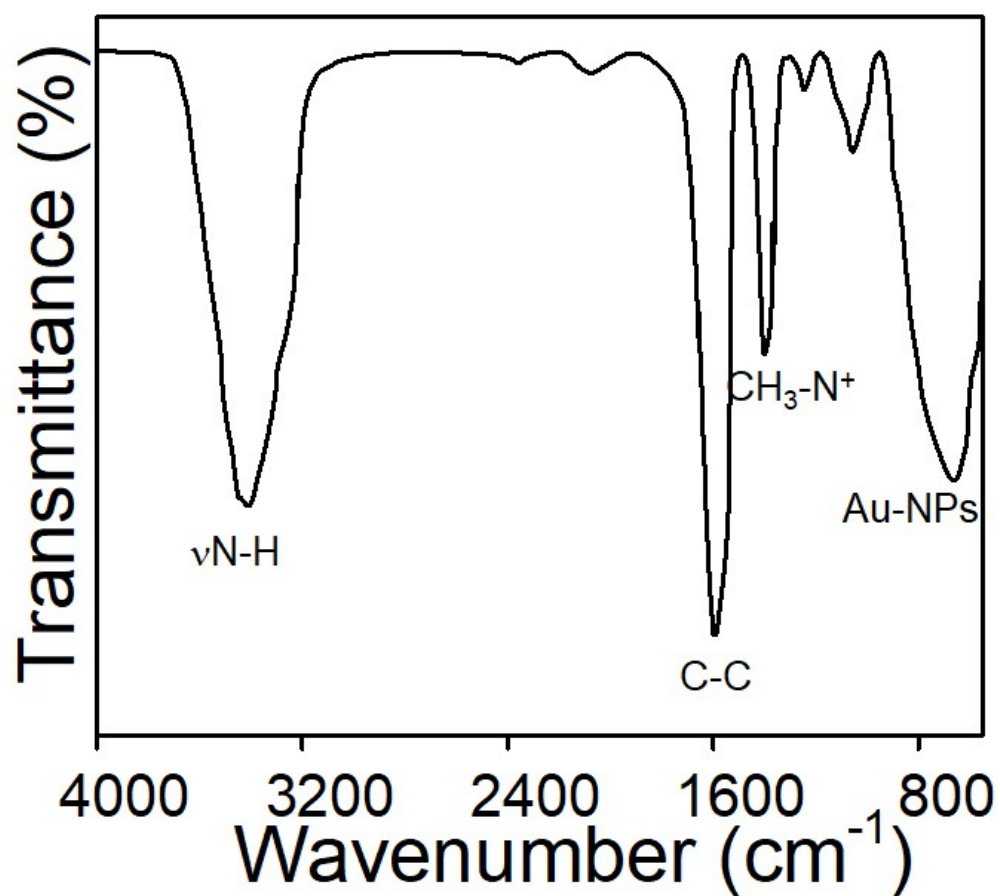

**Figure S5** FTIR spectra of IL modified NC@Au-NPs.

**Table S3** Full width at Half Maxima (FWHM) of (A) NC@Au-NPs and (B)Au-NPs.

**(A) NC@Au-NPs**

|         |        | Value     | Standard Error |
|---------|--------|-----------|----------------|
| Book1_C | y0     | 0.10659   | 0.00641        |
|         | xc     | 528.60563 | 1.94352        |
|         | w      | 67.65688  | 4.75435        |
|         | A      | 18.95404  | 1.48874        |
|         | sigma  | 33.82844  | 2.37717        |
|         | FWHM   | 79.65989  | 5.59782        |
|         | Height | 0.22353   | 0.01201        |

**(B) Au-NPs**

|         |        | Value    | Standard Error |
|---------|--------|----------|----------------|
| Book1_B | y0     | 0.07522  | 0.00414        |
|         | xc     | 520.5291 | 2.27891        |
|         | w      | 63.87246 | 5.45418        |
|         | A      | 9.96513  | 0.93388        |
|         | sigma  | 31.93623 | 2.72709        |
|         | FWHM   | 75.20407 | 6.42181        |
|         | Height | 0.12448  | 0.00823        |



$$\text{FWHM}=0.5346wL+\text{sqrt}(0.2166*wL^2+wG^2)$$

whereas,

wL and wG (widths of the Lorentzian and Gaussian contributions) are given by the Origin software after the fitting.

**Table S4** Table showing the peak current and peak potential difference of each electrode calculated from figure S2.

| <i>Electrode</i>        | <i>Anodic<br/>current</i> | <i>Ep</i>   | <i>Ec</i>   | <i>Peak Potential<br/>difference</i> |
|-------------------------|---------------------------|-------------|-------------|--------------------------------------|
| <i>Au-NPS</i>           | 0.096270791               | 0.445678228 | 0.026025712 | 0.419652517                          |
| <i><u>NC@Au-NPs</u></i> | 0.2329252                 | 0.430804696 | 0.022319052 | 0.408485644                          |
| <i>Au-NPs/PDA</i>       | 0.102208367               | 0.446608261 | 0.012255572 | 0.458863833                          |

|                                       |             |             |             |             |
|---------------------------------------|-------------|-------------|-------------|-------------|
| <b><i>NC@Au-NPs/PDA</i></b>           | 0.26041408  | 0.348232281 | 0.067018129 | 0.281214152 |
| <b><i>Au-NPs/PDA-IL</i></b>           | 0.124572978 | 0.359583405 | 0.085441434 | 0.274141971 |
| <b><u><i>NC@Au-NPs/PDA-IL</i></u></b> | 0.32852887  | 0.310595934 | 0.102511091 | 0.208084843 |

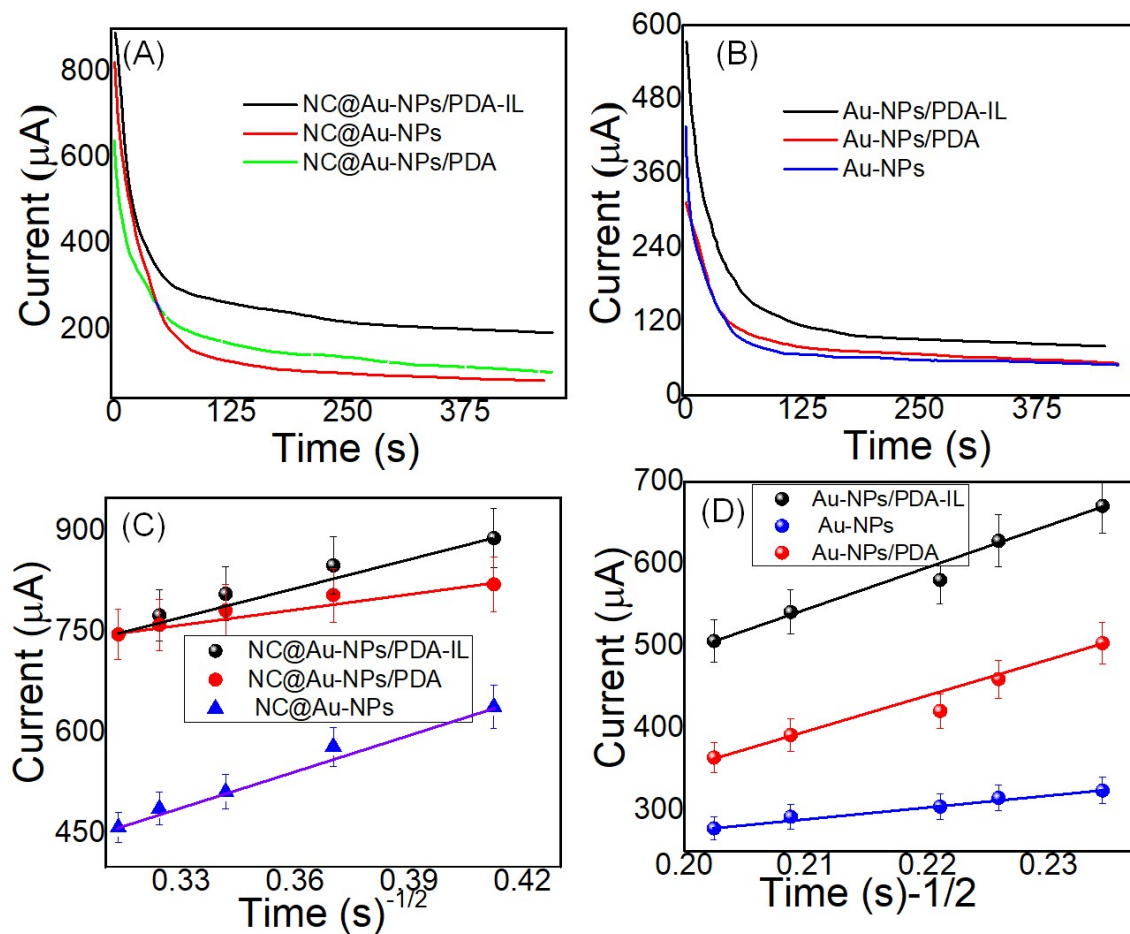

**Figure S6.** Chronoamperometric curve of (A) NC@Au-NPs, NC@Au-NPs/PDA, NC@Au-NPs/PDA-IL electrodes and (B) Au-NPs, Au-NPs/PDA, Au-NPs/PDA-IL in PBS against 1 mM of  $[\text{Fe}(\text{CN})_6]^{3-}$ . Electrochemical impedance spectroscopy (EIS) of NC@Au-NPs (C) and Au (D) based electrodes by using 2mM of  $[\text{Fe}(\text{CN})_6]^{3-}$  as a redox probe. (C & D) Dependence of IC/IL on the  $(\text{time})^{1/2}$  derived from their respective chronoamperogram data.

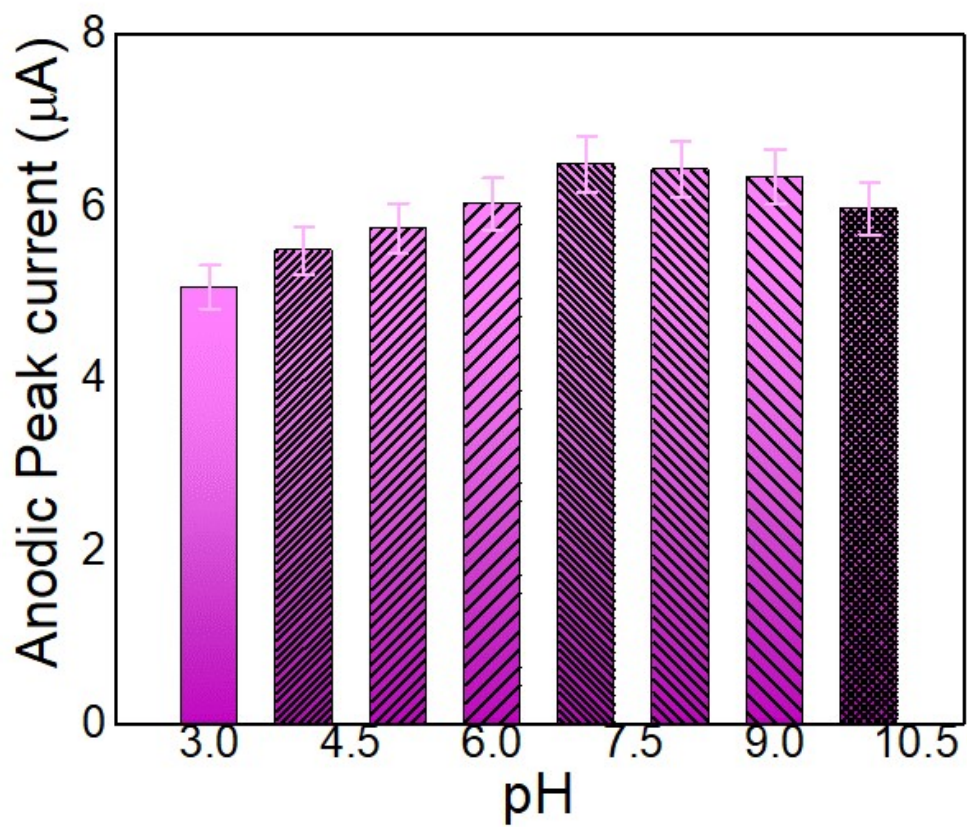

**Figure S7.** Optimization parameters pH at which the sensitive behavior of NC@Au-NPs/PDA/IL electrode was determined.

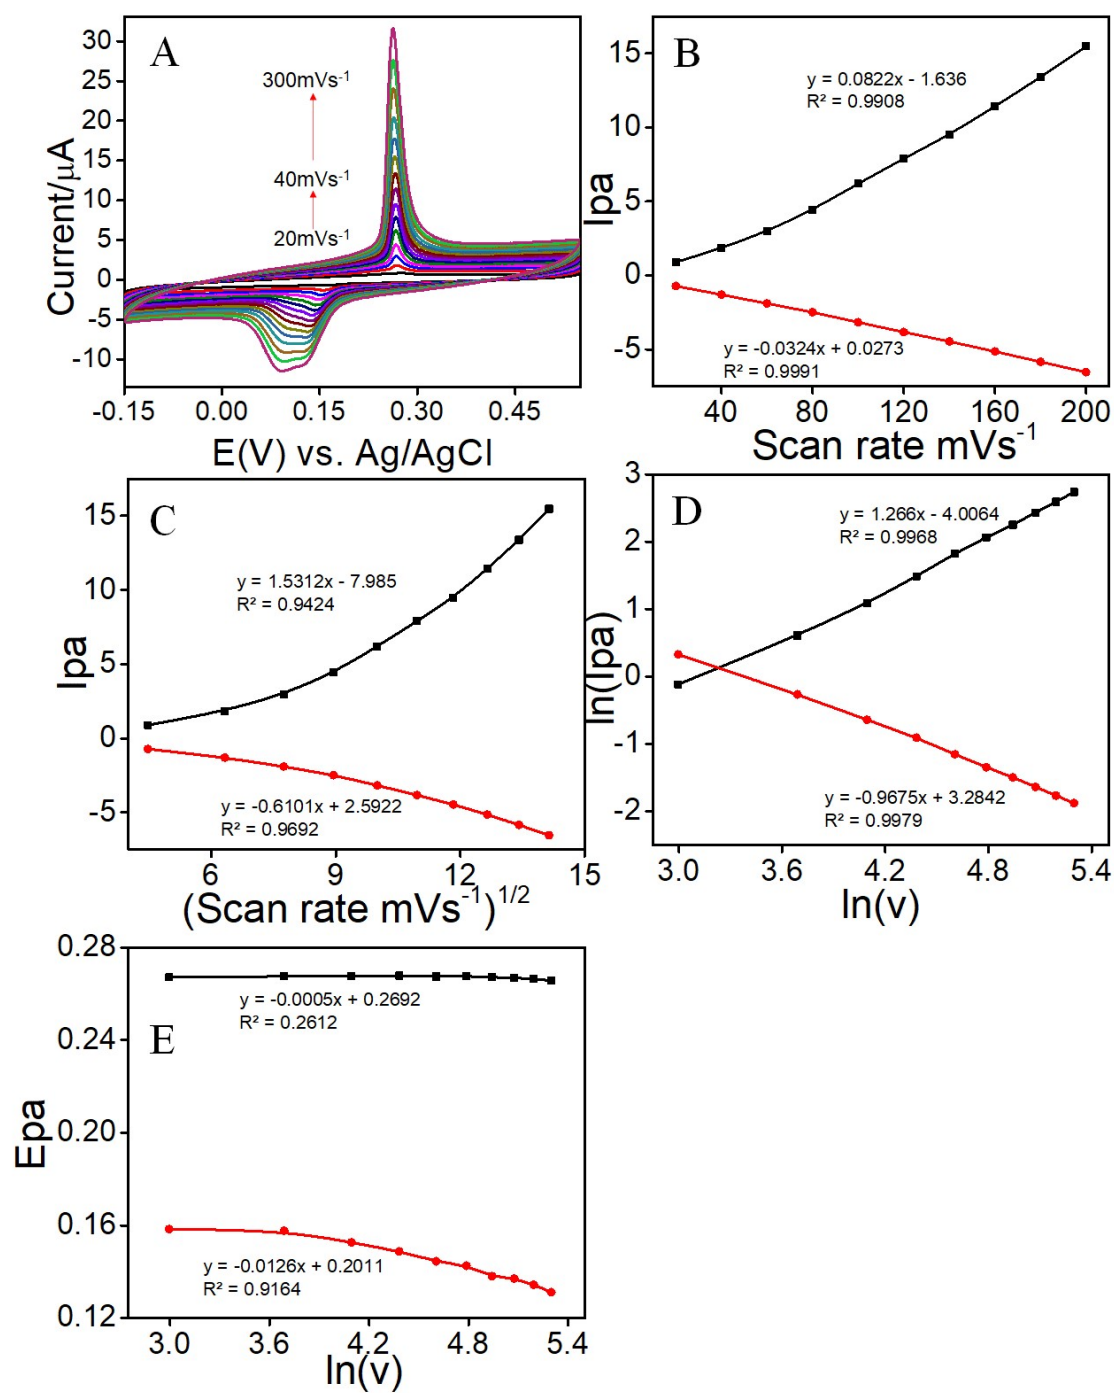

**Figure S8.** (A) cyclic voltammetry of Au-NPs/PDA-IL electrode at the scan rate ranging from 5 to 200 mV/s in the presence of 5  $\mu\text{M}$  DA in phosphate buffer (pH 7.0) and its corresponding calibration plots (B-C) scan rate (mV/s) vs Current( $\mu\text{A}$ ) and square root scan rate (mV/s) vs Current( $\mu\text{A}$ ), respectively and (D-

E) log of scan rate (mV/s) vs oxidizing potential(mV) and log of scan rate (mV/s) vs log of Current( $\mu$ A), respectively.

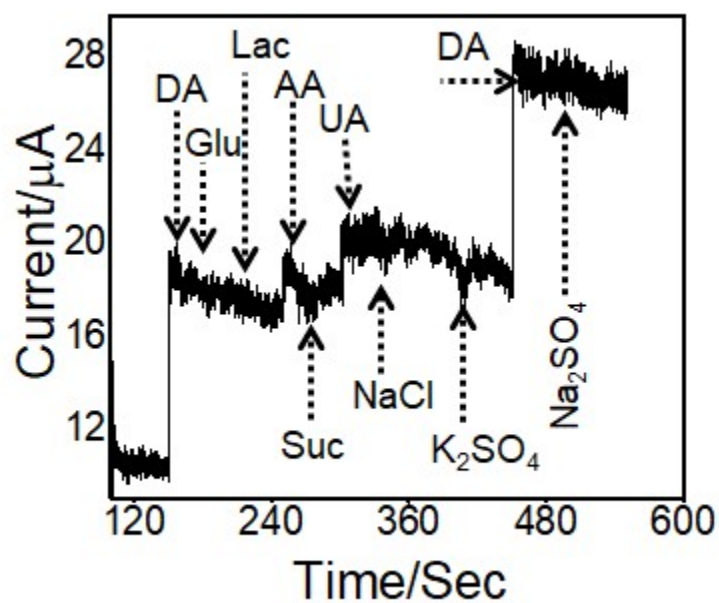

**Figure S9:** Selective amperometric response of the NC@Au-NPs/PDA/IL electrode exposed towards simultaneous monitoring of DA and co-existing electroactive species such as organic (DA, AA, UA, & Lac) and inorganic (KCl, NaCl, Na<sub>2</sub>SO<sub>4</sub>, & K<sub>2</sub>SO<sub>4</sub>) species in 0.1M PBS (pH;7) electrolyte.

**Table S5** comparison of the electrochemical determination of NC@Au-NPs/PDA/IL modified electrode towards DA detection with the reported data.

| Sr. # | Modified Electrode | Applied Potential (V) | Detection Limit ( $\mu\text{M}$ ) | Linear Range ( $\mu\text{M}$ ) | Ref.           |
|-------|--------------------|-----------------------|-----------------------------------|--------------------------------|----------------|
| 1     | RGO/Au nanoplate   | -0.2–6                | 1.4                               | 6.8–41                         | S <sup>4</sup> |
| 2     | RGO-AuNPs-CSHMs    | -0.2–8                | 0.3                               | 1–200                          | S <sup>5</sup> |
| 3     | AgNPs/rGO          | -1–1                  | 5.4                               | 10–800                         | S <sup>6</sup> |
| 4     | RGO/AuNPs          | -1.5–1                | 0.137                             | 0.14–700                       | S <sup>7</sup> |
| 5     | PANI-AuNPs         | -0.4–1.4              | 16                                | 0.270–0.361                    | S <sup>8</sup> |
| 6     | Au NPs/N-doped CN  | -0.3–0.4              | 0.007                             | 0.02–700                       | S <sup>9</sup> |
| 7     | NC@Au-NPs/PDA/IL   | -0.6-0.6              | 0.002                             | 0.05-1                         | This work      |

**Table S6.** Determination of DA in DA hydrochloride injection using NC@Au-NPs/PDA/IL electrode.

| DA sample | Added ( $\mu\text{M}$ ) | Found [a] ( $\mu\text{M}$ ) | Recovery (%) | RSD [b] (%) |
|-----------|-------------------------|-----------------------------|--------------|-------------|
| 1         | 0                       | 1.78                        | -            | -           |
| 2         | 2                       | 3.75                        | 87.7         | 3.7         |
| 3         | 2                       | 4.7                         | 92.8         | 3.65        |

1, 2 and 3 diluted DA hydrochloride injection sample, [a] Standard deviation, [b] Relative standard deviation (n = 3).

## References:

1. A. S. Saleemi, M. Hafeez, A. Munawar, N. Akhtar, W. Abbas, M. E. Mazhar, Z. Shafiq, A. P. Davis and S.-L. Lee, *Journal of Materials Chemistry C*, 2020, **8**, 12984-12992.
2. N. Touj, A. S. Al-Ayed, M. Sauthier, L. Mansour, A. H. Harrath, J. Al-Tamimi, I. Özdemir, S. Yaşar and N. Hamdi, *RSC Advances*, 2018, **8**, 40000-40015.
3. Y. Abbas, S. Ali, M. Basharat, W. Zou, F. Yang, W. Liu, S. Zhang, Z. Wu, N. Akhtar and D. Wu, *ACS Applied Nano Materials*, 2020, **3**, 11383-11390.
4. C. Wang, J. Du, H. Wang, C. e. Zou, F. Jiang, P. Yang and Y. Du, *Sensors and Actuators B: Chemical*, 2014, **204**, 302-309.
5. X. Liu, L. Xie and H. Li, *Journal of Electroanalytical Chemistry*, 2012, **682**, 158-163.
6. B. Kaur, T. Pandiyan, B. Satpati and R. Srivastava, *Colloids and Surfaces B: Biointerfaces*, 2013, **111**, 97-106.
7. C.-S. Lee, S. H. Yu and T. H. Kim, *Nanomaterials*, 2018, **8**.
8. S. Mahalakshmi and V. Sridevi, *Electrocatalysis*, 2021, **12**, 415-435.
9. Z. Shi, X. Wu, Z. Zou, L. Yu, F. Hu, Y. Li, C. Guo and C. M. Li, *Biosensors and Bioelectronics*, 2021, **186**, 113303.
